# Supplementary material
Source: MDPI journal article supplement (https://www.mdpi.com/2073-4395/13/6/1632)
Supplement: s1 [file s1]

Supplementary Data

**Supplementary Figure S1.** Identified consensus motif in each member of the *TPS* clades (A) TPS-a (B) TPS-b (C) TPS-c (D) TPS-e/f and (E) TPS-g.

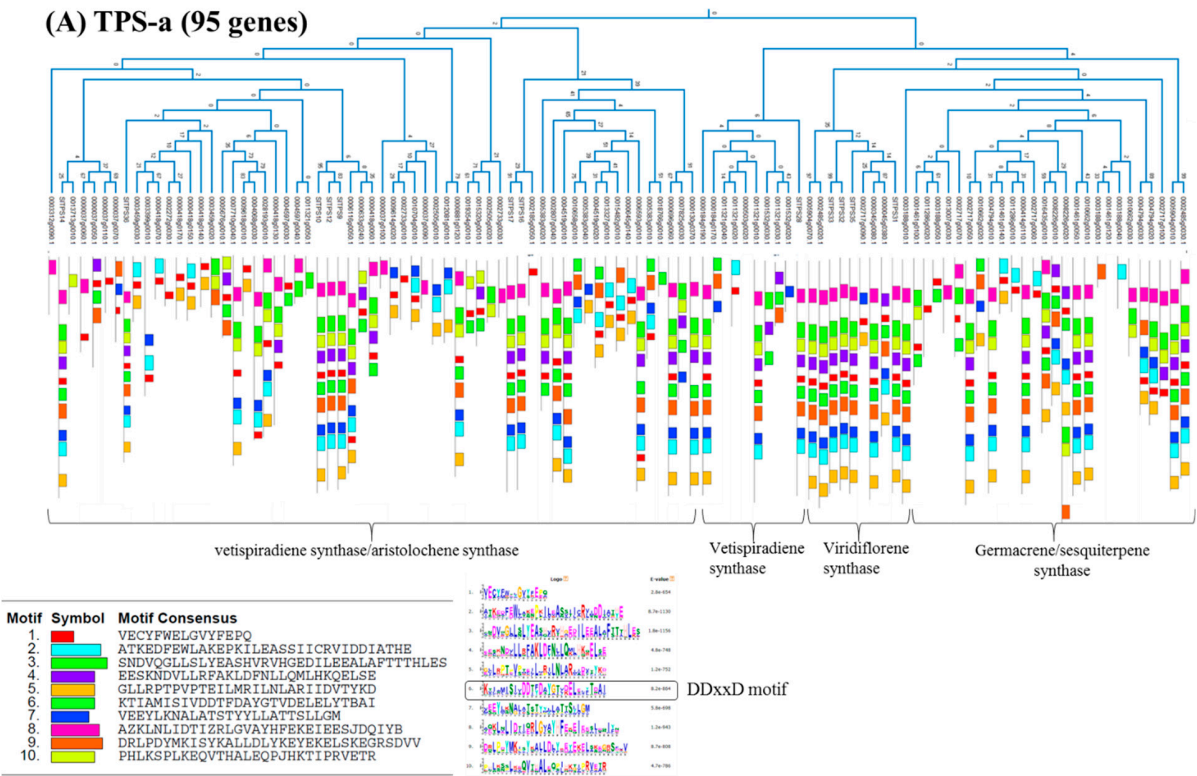

(B) TPS-b (32 genes)

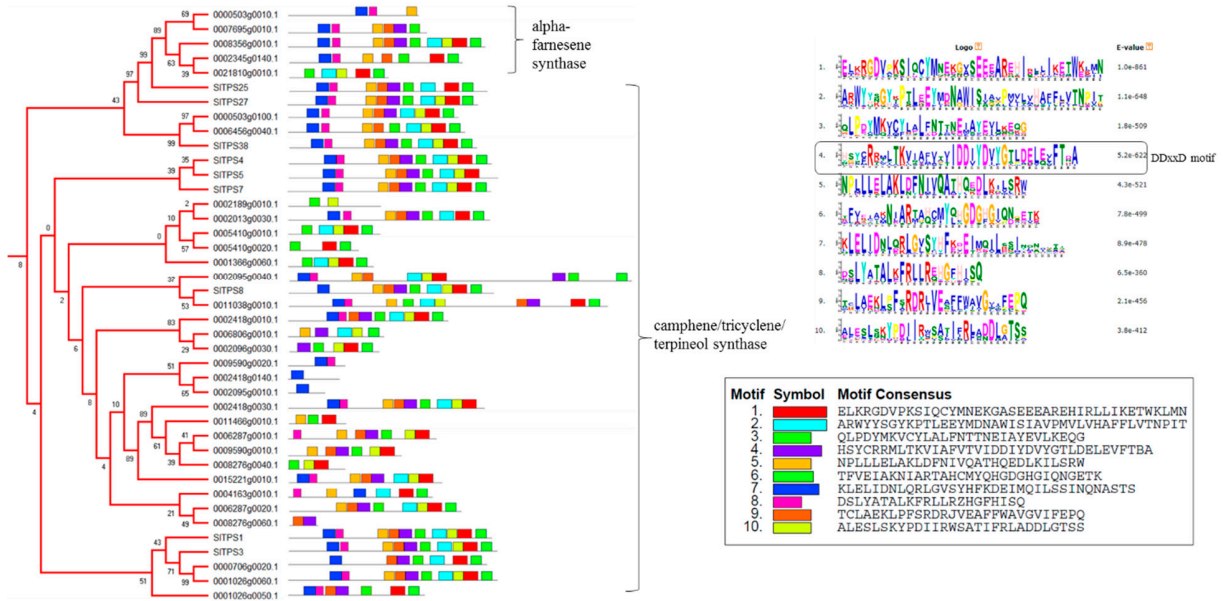

| RRX <sub>5</sub> W motif |                                                 |
|--------------------------|-------------------------------------------------|
| 0000503g0010             | GRKGMCHRTNKLHSTIKKQSLPERSKICTYKPNIWKYDHLIT      |
| 0000503g0100             | MDLRRSGNYKPSIWEDGYVQS                           |
| 0000706g0020             | PLNHS-TISTNQSSFS--LNPIRRSGNYEPTTWDFEY--IQSIHND  |
| 0001026g0060             | PLNHS-TISTNQSSSD--LNPIRRSGNYEPTTWDFEY--IQSIHND  |
| 0002013g0030             | NSTSPKAEPLSHSSIPNTMNTDRRSGNYKPTWDFEY--IESISND   |
| 0002345g0140             | SNKRQSTTKKQSLPERKISTYKPNIWKYDHLIT               |
| 0002418g0010             | LSTKTEPSPNQYSAISASDQNPTRRSGNYQPTMWDFEY--IQSIHND |
| 0002418g0030             | LSTKTEPSPNQYSAISASDQNLTRRSGNYQPTMWDFEY--IQSIHND |
| 0006456g0040             | MDLRRSGNYKPSIWEDGYVQS                           |
| 0008356g0010             | TKKLHSTIKKQSHPERKISTYKPNIWKYDHLIT               |
| 0009590g0020             | FSTKTEPSPHQYSAISASDQNPTRRSGNYQPTMWDFEY--IQSIHND |
| SlTPS1                   | IIITKHSHPISATRRSGNYKPTLWDFQF--IESLHNP           |
| SlTPS3                   | PLNYSPISTNIISSSNGIINPIRRSGNYEPTMWNYEY--IQSTHNP  |
| SlTPS4                   | INGGKPSLLIVVSKASSNPPTTRRSGNYKPTMWDFQF--IQSVNNL  |
| SlTPS5                   | LRRSANN-IIITKHSHP-ISTTRRSGNYKPTMWDFQF--IQLHNP   |
| SlTPS7                   | LHHSISARGAINNISTP-ISATRRSGNYKPTMWDFQF--IQLHNP   |
| SlTPS27                  | TTSFRKSNIDETLIGRRNANYKPNIWKYDILQS               |
| SlTPS38                  | MLQSCISTMDIRRSGNYKPSIWEDGYVQS                   |

### (C) TPS-c (11 genes)

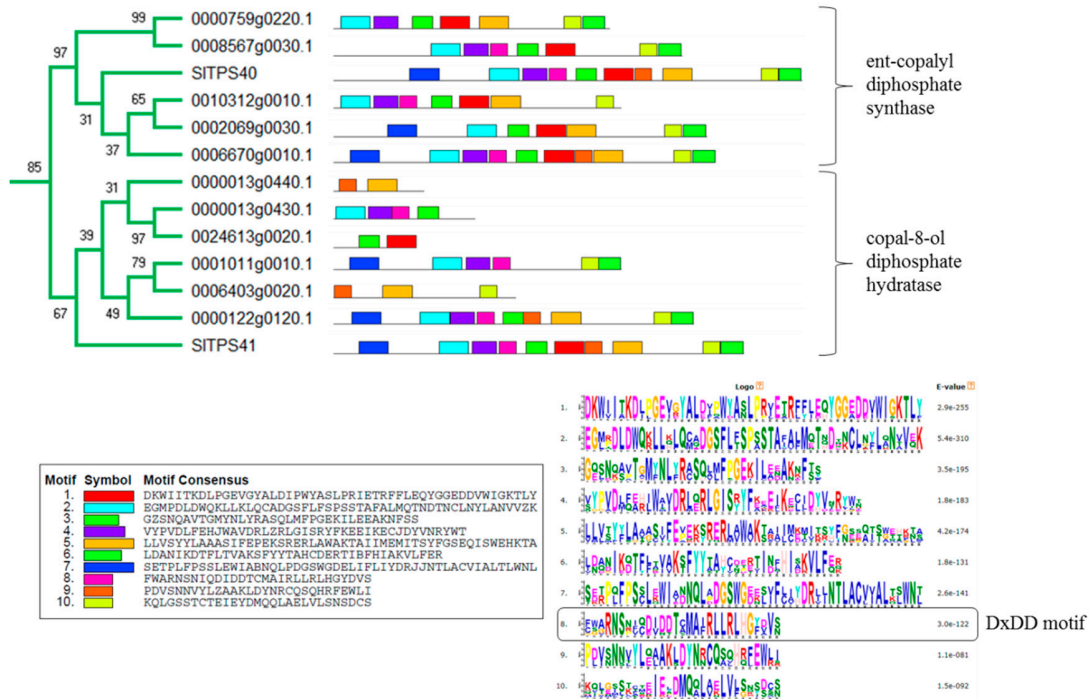

### (D) TPS-e/f (13 genes)

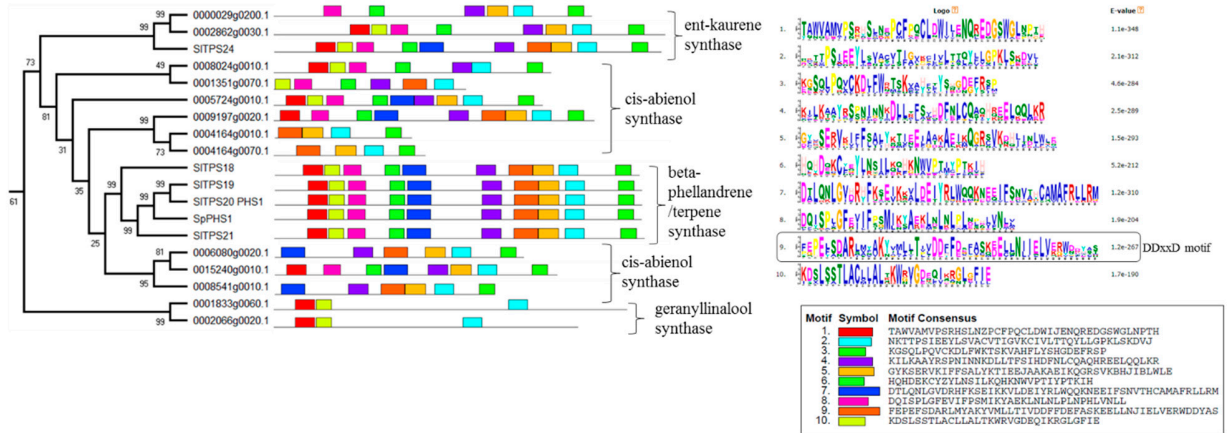

(E) TPS-g (1 gene)

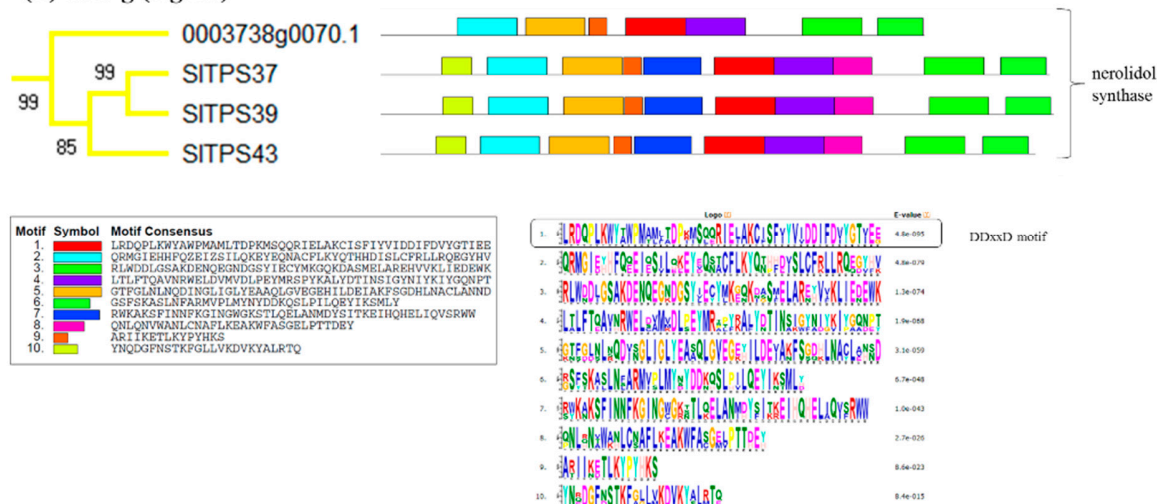

**Supplementary Figure S2.** KEGG annotation of the 160 TPS identified in the tobacco genome. Functional classification of the annotated TPS (A). KEGG orthology (KO) annotation of the 66 TPS genes

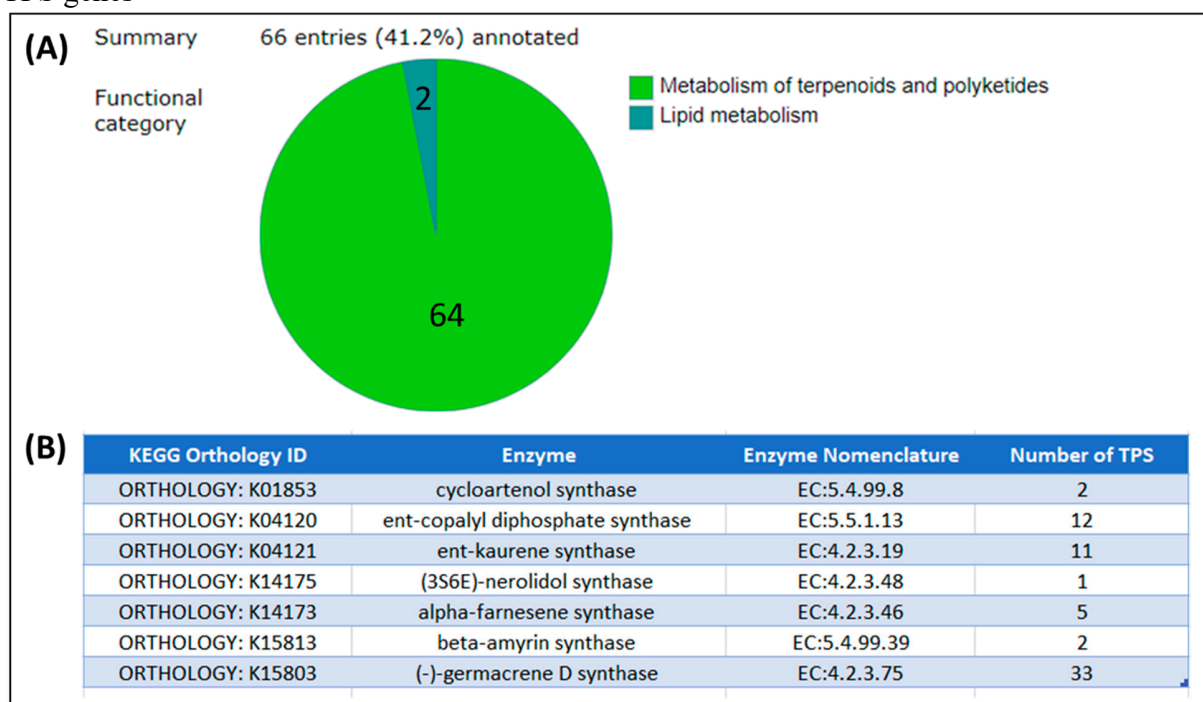

**Supplementary Figure S3.** Heatmap of Pearson correlation coefficient (PCC) analysis of gene expression of members of each identified co-expression module in (A) diurnal global transcriptome and (B) topping transcriptome of tobacco genes.



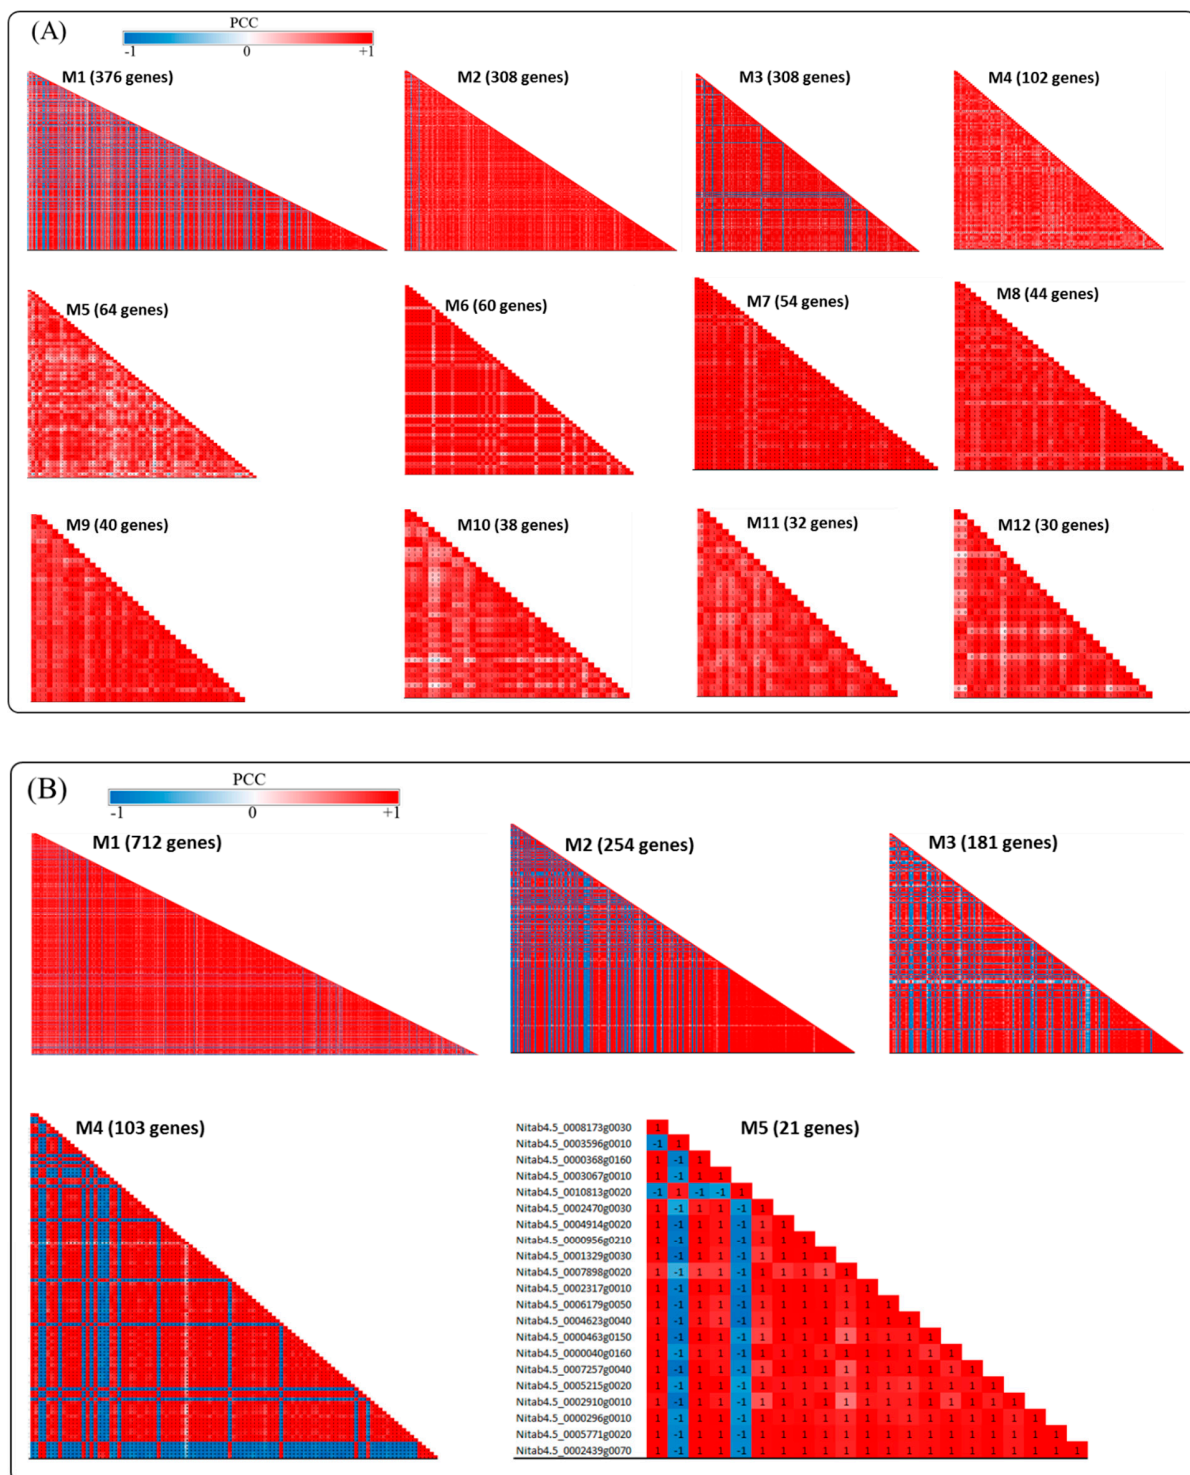

**Supplementary Figure S4.** Pearson correlation coefficient (PCC) analysis of gene expression of members of each terpene-related biosynthetic gene clusters in diurnal global transcriptome of tobacco genes. Cluster number represents the cluster number indicated in Supplementary Table S1.



**Supplementary Table S1.** Gene members of each terpene-related metabolic gene clusters (MGCs) in tobacco genome.

| Member Number | Cluster ID | Chromosome Number | Gene ID               | Annotation                                                                                                                                                                                        |
|---------------|------------|-------------------|-----------------------|---------------------------------------------------------------------------------------------------------------------------------------------------------------------------------------------------|
| 1             | Cluster 9  | Nt07              | Nitab4.5_0001026g0020 | Expansin/pollen allergen, DPBB domain, RlpA-like double-psi beta-barrel domain, Major pollen allergen Lol pI, Expansin, cellulose-binding-like domain, Expansin/Lol pI, Barwin-like endoglucanase |
| 2             |            | Nt07              | Nitab4.5_0001026g0060 | Terpenoid synthase, Terpene synthase, N-terminal domain, Terpene synthase, metal-binding domain, Terpenoid cyclases/protein prenyltransferase alpha-alpha toroid                                  |
| 3             |            | Nt07              | Nitab4.5_0001026g0050 | Terpenoid synthase, Terpene synthase, N-terminal domain, Terpenoid cyclases/protein prenyltransferase alpha-alpha toroid, Terpene synthase, metal-binding domain                                  |
| 4             |            | Nt07              | Nitab4.5_0001026g0040 | Peptidase C48, SUMO/Sentrin/Ubl1                                                                                                                                                                  |
| 5             |            | Nt07              | Nitab4.5_0001026g0030 |                                                                                                                                                                                                   |
| 6             |            | Nt07              | Nitab4.5_0001026g0070 | GDP dissociation inhibitor, Rab GDI protein                                                                                                                                                       |
| 1             | Cluster 18 | Nt10              | Nitab4.5_0003002g0010 | Chloramphenicol acetyltransferase-like domain, Transferase                                                                                                                                        |
| 2             |            | Nt10              | Nitab4.5_0003002g0020 | Homeodomain-like                                                                                                                                                                                  |
| 3             |            | Nt10              | Nitab4.5_0003002g0030 | Chloramphenicol acetyltransferase-like domain, Transferase                                                                                                                                        |
| 4             |            | Nt10              | Nitab4.5_0004942g0020 |                                                                                                                                                                                                   |
| 5             |            | Nt10              | Nitab4.5_0004942g0010 |                                                                                                                                                                                                   |
| 6             |            | Nt10              | Nitab4.5_0000696g0060 | Terpenoid synthase, Terpenoid cyclases/protein prenyltransferase alpha-alpha toroid, Terpene synthase, metal-binding domain, Terpene synthase, N-terminal domain                                  |
| 7             |            | Nt10              | Nitab4.5_0000696g0050 |                                                                                                                                                                                                   |
| 8             |            | Nt10              | Nitab4.5_0000696g0040 |                                                                                                                                                                                                   |
| 1             | Cluster 21 | Nt13              | Nitab4.5_0000404g0170 | Terpenoid cyclases/protein prenyltransferase alpha-alpha toroid, Prenyltransferase/squalene oxidase                                                                                               |

|    |            |      |                       |                                                                                                                                                                                                                                                                                          |
|----|------------|------|-----------------------|------------------------------------------------------------------------------------------------------------------------------------------------------------------------------------------------------------------------------------------------------------------------------------------|
| 2  | Cluster 22 | Nt13 | Nitab4.5_0000404g0180 | Protein kinase-like domain, Protein kinase domain, Serine/threonine- / dual specificity protein kinase, catalytic domain, Protein kinase, ATP binding site, Serine/threonine-protein kinase, active site, Glycosyl transferase, family 1, Concanavalin A-like lectin/glucanase, subgroup |
| 3  |            | Nt13 | Nitab4.5_0000404g0190 | Pentatricopeptide repeat                                                                                                                                                                                                                                                                 |
| 4  |            | Nt13 | Nitab4.5_0000404g0200 | Cytochrome P450, Cytochrome P450, E-class, group I, Cytochrome P450, conserved site                                                                                                                                                                                                      |
| 5  |            | Nt13 | Nitab4.5_0000404g0240 | rRNA-processing arch domain, Helicase, superfamily 1/2, ATP-binding domain, Helicase, C-terminal, DSH, C-terminal, RNA helicase, ATP-dependent, SK12/DOB1, P-loop containing nucleoside triphosphate hydrolase, DNA/RNA helicase, DEAD/DEAH box type, N-terminal                         |
| 1  |            | Nt13 | Nitab4.5_0001461g0040 | NAC domain                                                                                                                                                                                                                                                                               |
| 2  |            | Nt13 | Nitab4.5_0001461g0060 | Lactate/malate dehydrogenase, N-terminal, NAD(P)-binding domain, Lactate dehydrogenase/glycoside hydrolase, family 4, C-terminal, Malate dehydrogenase, type 2, Malate dehydrogenase, active site, Lactate/malate dehydrogenase, C-terminal                                              |
| 3  |            | Nt13 | Nitab4.5_0001461g0050 | Terpenoid synthase, Terpene synthase, metal-binding domain, Terpenoid cyclases/protein prenyltransferase alpha-alpha toroid, Terpene synthase, N-terminal domain                                                                                                                         |
| 4  |            | Nt13 | Nitab4.5_0001461g0070 | Cytochrome P450, Cytochrome P450, E-class, group I, Cytochrome P450, conserved site                                                                                                                                                                                                      |
| 5  |            | Nt13 | Nitab4.5_0001461g0080 |                                                                                                                                                                                                                                                                                          |
| 6  |            | Nt13 | Nitab4.5_0001461g0110 |                                                                                                                                                                                                                                                                                          |
| 7  |            | Nt13 | Nitab4.5_0001461g0090 |                                                                                                                                                                                                                                                                                          |
| 8  |            | Nt13 | Nitab4.5_0001461g0140 | Terpenoid synthase, Terpene synthase, metal-binding domain                                                                                                                                                                                                                               |
| 9  |            | Nt13 | Nitab4.5_0001461g0120 | Terpenoid synthase, Terpene synthase, metal-binding domain                                                                                                                                                                                                                               |
| 10 |            | Nt13 | Nitab4.5_0001461g0100 | Terpenoid synthase, Terpene synthase, metal-binding domain, Terpene synthase, N-terminal domain, Terpenoid cyclases/protein prenyltransferase alpha-alpha toroid                                                                                                                         |



|    |            |      |                       |                                                                                                                                                                                                                                                                                                                                                                        |
|----|------------|------|-----------------------|------------------------------------------------------------------------------------------------------------------------------------------------------------------------------------------------------------------------------------------------------------------------------------------------------------------------------------------------------------------------|
| 11 | Cluster 23 | Nt13 | Nitab4.5_0001461g0130 | Cytochrome P450, Cytochrome P450, E-class, group I, Cytochrome P450, conserved site                                                                                                                                                                                                                                                                                    |
| 12 |            | Nt13 | Nitab4.5_0004794g0010 | Terpene synthase, N-terminal domain, Terpene synthase, metal-binding domain, Terpenoid cyclases/protein prenyltransferase alpha-alpha toroid, Terpenoid synthase                                                                                                                                                                                                       |
| 13 |            | Nt13 | Nitab4.5_0004794g0030 | Terpenoid synthase, Terpenoid cyclases/protein prenyltransferase alpha-alpha toroid, Terpene synthase, metal-binding domain, Terpene synthase, N-terminal domain                                                                                                                                                                                                       |
| 14 |            | Nt13 | Nitab4.5_0004794g0020 | Terpenoid synthase, Terpenoid cyclases/protein prenyltransferase alpha-alpha toroid, Terpene synthase, N-terminal domain, Terpene synthase, metal-binding domain                                                                                                                                                                                                       |
| 15 |            | Nt13 | Nitab4.5_0004794g0040 | AMP-binding, conserved site, AMP-binding enzyme C-terminal domain, AMP-dependent synthetase/ligase                                                                                                                                                                                                                                                                     |
| 1  |            | Nt14 | Nitab4.5_0000037g0010 | Pentatricopeptide repeat, Tetratricopeptide-like helical                                                                                                                                                                                                                                                                                                               |
| 2  |            | Nt14 | Nitab4.5_0000037g0030 | AMP-binding, AMP-binding, conserved site, AMP-dependent synthetase/ligase                                                                                                                                                                                                                                                                                              |
| 3  |            | Nt14 | Nitab4.5_0000037g0020 | Leucine-rich repeat-containing N-terminal, type 2, Protein kinase domain, Protein kinase, ATP binding site, Protein kinase-like domain, Serine/threonine- / dual specificity protein kinase, catalytic domain, Serine/threonine-protein kinase, active site, Leucine-rich repeat, Concanavalin A-like lectin/glucanase, subgroup, Leucine-rich repeat, typical subtype |
| 4  |            | Nt14 | Nitab4.5_0000037g0060 | Terpene synthase, metal-binding domain, Terpenoid synthase, Terpene synthase, N-terminal domain, Terpenoid cyclases/protein prenyltransferase alpha-alpha toroid                                                                                                                                                                                                       |
| 5  |            | Nt14 | Nitab4.5_0000037g0070 | Terpenoid synthase, Terpene synthase, metal-binding domain                                                                                                                                                                                                                                                                                                             |
| 6  |            | Nt14 | Nitab4.5_0000037g0040 | Ribosomal protein S18                                                                                                                                                                                                                                                                                                                                                  |
| 7  |            | Nt14 | Nitab4.5_0000037g0050 | Terpenoid synthase, Terpene synthase, metal-binding domain                                                                                                                                                                                                                                                                                                             |
| 8  |            | Nt14 | Nitab4.5_0000037g0080 | Terpenoid synthase, Terpenoid cyclases/protein prenyltransferase alpha-alpha toroid                                                                                                                                                                                                                                                                                    |
| 1  | Cluster 24 | Nt14 | Nitab4.5_0000037g0100 | Terpene synthase, N-terminal domain, Terpenoid cyclases/protein prenyltransferase alpha-alpha toroid                                                                                                                                                                                                                                                                   |
| 2  |            | Nt14 | Nitab4.5_0000037g0110 | Terpenoid synthase, Terpene synthase, metal-binding domain                                                                                                                                                                                                                                                                                                             |
| 3  |            | Nt14 | Nitab4.5_0000037g0120 |                                                                                                                                                                                                                                                                                                                                                                        |

|    |            |      |                       |                                                                                                                                                                                                                                                                         |
|----|------------|------|-----------------------|-------------------------------------------------------------------------------------------------------------------------------------------------------------------------------------------------------------------------------------------------------------------------|
| 4  | Cluster 32 | Nt14 | Nitab4.5_0000037g0150 | Nucleic acid-binding, OB-fold                                                                                                                                                                                                                                           |
| 5  |            | Nt14 | Nitab4.5_0000037g0130 | Nucleic acid-binding, OB-fold                                                                                                                                                                                                                                           |
| 6  |            | Nt14 | Nitab4.5_0000037g0140 | EF-Hand 1, calcium-binding site, UDP-glucuronosyl/UDP-glucosyltransferase                                                                                                                                                                                               |
| 7  |            | Nt14 | Nitab4.5_0000037g0170 |                                                                                                                                                                                                                                                                         |
| 8  |            | Nt14 | Nitab4.5_0000037g0180 | Xyloglucan endotransglucosylase/hydrolase, Xyloglucan endo-transglycosylase, C-terminal, Glycoside hydrolase, family 16, Concanavalin A-like lectin/glucanase, subgroup, Glycoside hydrolase, family 16, active site, Concanavalin A-like lectin/glucanases superfamily |
| 9  |            | Nt14 | Nitab4.5_0000037g0190 | Tic22-like                                                                                                                                                                                                                                                              |
| 10 |            | Nt14 | Nitab4.5_0000037g0160 | Zinc finger, C2H2                                                                                                                                                                                                                                                       |
| 11 |            | Nt14 | Nitab4.5_0000037g0200 | Cytochrome P450, Cytochrome P450, conserved site, Cytochrome P450, E-class, group I                                                                                                                                                                                     |
| 12 |            | Nt14 | Nitab4.5_0000037g0210 | Cytochrome P450, E-class, group I, Cytochrome P450                                                                                                                                                                                                                      |
| 13 |            | Nt14 | Nitab4.5_0000037g0230 |                                                                                                                                                                                                                                                                         |
| 14 |            | Nt14 | Nitab4.5_0000037g0220 |                                                                                                                                                                                                                                                                         |
| 1  |            | Nt22 | Nitab4.5_0000418g0010 | Cytochrome P450, Cytochrome P450, conserved site, Cytochrome P450, E-class, group I                                                                                                                                                                                     |
| 2  |            | Nt22 | Nitab4.5_0000418g0020 |                                                                                                                                                                                                                                                                         |
| 3  |            | Nt22 | Nitab4.5_0000418g0030 | Zinc finger, CW-type, SET domain, Post-SET domain                                                                                                                                                                                                                       |
| 4  |            | Nt22 | Nitab4.5_0000418g0050 | Transcription factor, K-box, Transcription factor, MADS-box                                                                                                                                                                                                             |
| 5  |            | Nt22 | Nitab4.5_0000418g0040 | GDP-fucose protein O-fucosyltransferase                                                                                                                                                                                                                                 |
| 6  |            | Nt22 | Nitab4.5_0000418g0060 | Terpenoid synthase, Terpene synthase, metal-binding domain, Terpene synthase, N-terminal domain, Terpenoid cyclases/protein prenyltransferase alpha-alpha toroid                                                                                                        |

|    |      |                       |                                                                                                                                                                  |
|----|------|-----------------------|------------------------------------------------------------------------------------------------------------------------------------------------------------------|
| 7  | Nt22 | Nitab4.5_0000418g0070 | Terpene synthase, metal-binding domain, Terpenoid synthase                                                                                                       |
| 8  | Nt22 | Nitab4.5_0000418g0080 |                                                                                                                                                                  |
| 9  | Nt22 | Nitab4.5_0000418g0090 | Cytochrome P450                                                                                                                                                  |
| 10 | Nt22 | Nitab4.5_0000418g0100 | Cytochrome P450                                                                                                                                                  |
| 11 | Nt22 | Nitab4.5_0000418g0110 | Decaprenyl diphosphate synthase-like                                                                                                                             |
| 12 | Nt22 | Nitab4.5_0000418g0120 | Ribonuclease H-like domain                                                                                                                                       |
| 13 | Nt22 | Nitab4.5_0000418g0130 | Terpene synthase, metal-binding domain, Terpene synthase, N-terminal domain, Terpenoid synthase, Terpenoid cyclases/protein prenyltransferase alpha-alpha toroid |
| 14 | Nt22 | Nitab4.5_0000418g0170 | Terpenoid synthase, Terpene synthase, metal-binding domain                                                                                                       |
| 15 | Nt22 | Nitab4.5_0000418g0150 | Terpene synthase, metal-binding domain, Terpenoid synthase                                                                                                       |
| 16 | Nt22 | Nitab4.5_0000418g0140 | Terpenoid synthase, Terpene synthase, metal-binding domain                                                                                                       |
| 17 | Nt22 | Nitab4.5_0000418g0160 | Decaprenyl diphosphate synthase-like, Di-trans-poly-cis-decaprenylcistransferase-like, conserved site                                                            |
| 18 | Nt22 | Nitab4.5_0003459g0020 | Terpenoid cyclases/protein prenyltransferase alpha-alpha toroid, Terpene synthase, N-terminal domain, Terpenoid synthase, Terpene synthase, metal-binding domain |
| 19 | Nt22 | Nitab4.5_0003459g0030 | Terpenoid synthase, Terpene synthase, metal-binding domain                                                                                                       |
| 20 | Nt22 | Nitab4.5_0003459g0010 | Cytochrome P450, E-class, group I, Cytochrome P450, Cytochrome P450, conserved site                                                                              |
